# Supplementary material
Source: PubMed Central journal article supplement (PMC4340664)
Supplement: NIHMS522155-supplement-01.pdf [file NIHMS522155-supplement-01.pdf]

## SUPPLEMENTARY MATERIAL

### METHODS AND MATERIALS

#### Characterization of Stock Gold Nanoparticles

**Electron Microscopy. TEM.** A drop of GNPs in double-distilled water was placed on formvar-coated 400-mesh nickel grids and incubated for 10 minutes at room temperature. The solution was wicked off the grids using a piece of #1 Whatman paper, after which the grids were allowed to dry completely. Photomicrographs were taken at 100,000x magnification at 75 kV and compared to a catalase crystal imaged at the same magnification and accelerating voltage. **HRTEM.** Drops (5 – 10  $\mu$ L) of GNPs in double-distilled water were placed on a carbon- and formvar-coated 400-mesh copper grid and the grids were allowed to dry completely. Photomicrographs were taken at 700 k. DigitalMicrograph® analysis software (Gatan Inc., Pleasanton, CA, USA) was used to analyze the interplanar distances within the GNPs presented on each photomicrograph. **SEM.** Drops (5-10  $\mu$ l) of GNPs were placed on a graphite-painted aluminum stub. The stub was placed on the holder and loaded into the instrument at an accelerating voltage of 10 kV.

**Dynamic Light-Scattering Spectroscopy.** Each 1-mL sample was transferred to a square cuvette to evaluate hydrodynamic particle size, and then transferred to a folded capillary cell for zeta potential measurements. In brief, 1mL of stock GNPs (in double-stilled water) was vortexed to promote a homogeneous solution. All sample measurements were acquired in triplicate at 25 °C.

**X-ray Photoelectron Spectroscopy.** High-collection efficiency was obtained by use of a magnetic immersion lens. The delay-line detector, comprising a multi-channel plate stack above a delay-line anode, was used for photoelectron detection. The instrument work function was calibrated to give a binding energy (BE) of 83.96 (0.05) eV (Mean [SD]) for the Au 4f<sub>7/2</sub> line for metallic gold and the spectrometer dispersion was adjusted to give a BE of 932.62 (0.05) eV (Mean [SD]) for the Cu2p<sub>3/2</sub> line of metallic copper. High-resolution analyses were carried out with an analysis area of 300 x 700 microns using a pass energy of 160 eV and with a step size of 0.5 eV. The samples experienced varying degrees of charging—

3.7 eV balance and 1 eV bias electrons were used to minimize this charging. Small pieces of silicon wafers were first ultrasonicated in deionized water (18.2MΩ) for 10 minutes to remove any debris from cutting the wafer and from adhering dust particles. The cleaned wafers were then boiled in Piranha solution (70:30 H<sub>2</sub>SO<sub>4</sub>:H<sub>2</sub>O<sub>2</sub>) for 10 minutes. The Piranha solution was cooled to room temperature before removing the wafers and each wafer was rinsed thoroughly with DI water (18.2 MΩ). The silicon wafers were dried under a stream of nitrogen and were cleaned by UV-ozone treatment for 30 minutes. This procedure removes any hydrocarbon contamination from the silicon wafer substrate and creates an extremely hydrophilic surface. The GNPs in solution were transferred to a re-circulated nitrogen atmosphere glove box (< 1 ppm O<sub>2</sub> and -80 °C dewpoint). The wafer was placed onto a clean copper XPS-sample stub. A small volume (~50 μl) of GNP sample solution was deposited onto the cleaned silicon wafer using a standard pipette. The solution was allowed to dry and the sample stub was transported into the XPS spectrometer vacuum for analysis.

### **Characterization of Gold Nanoparticles under Experimental Conditions**

**Pyrogene™ Recombinant Factor C (rFC) Endotoxin Detection Assay.** Stock GNPs at concentrations of 1.43x10<sup>3</sup>, 1.43x10<sup>6</sup>, or 1.43x10<sup>9</sup> GNPs/mL were added to DMEM/F12 50/50 medium containing supplements identical to that of our TEM and *ex-vivo* studies. Samples of culture medium that did not contain GNPs were included as negative controls. Duplicate samples were shipped at ambient temperature and stored at 2-8 °C upon arrival until performance of rFC assays. The rFC assay utilizes recombinant Factor C (rFC), an endotoxin-sensitive protein that is used in combination with a fluorogenic substrate to detect endotoxin in a solution via an incubating FLx800™ fluorescence microplate reader (BioTek Instruments, Inc., Winooski, VT, USA) equipped with WinKQCL® 4 Endotoxin Detection and Analysis Software (Lonza, Inc., Walkersville, MD, USA). Each assay was carried out in a 96-well plate and fluorescence was measured at time zero and after a one-hour incubation at 37°C ± 1°C using excitation/emission wavelengths of 380/440nm. The difference between the one-hour reading and the time-zero reading (ΔRFU) was corrected for blank ΔRFU fluorescence. The log net fluorescence was

proportional to the log endotoxin concentration and was linear in the 0.01 to 1.0 EU/mL range. The concentration of endotoxin in each sample was calculated relative to a standard curve.

**TEM.** Stock GNPs at concentrations of either  $2.85 \times 10^7$  or  $2.85 \times 10^{10}$  particles/mL medium (n= 3 samples) were exposed to culture conditions that were identical to those of our rat ovary culture experiments (see *Ex-Vivo Culture of Rat Ovary*) at four different time periods (0, 12, 24, and 48 hours) at 37°C in 5% CO<sub>2</sub> in air. These model concentrations were chosen due to pragmatic TEM considerations. DMEM/F12 50/50 medium was supplemented with 5% fetal calf serum, 50 µg/mL gentamycin, 50 ng/mL follicle-stimulating hormone (FSH) and  $1 \times 10^{-7}$  M androstenedione. After incubation, large protein aggregates were removed from the medium by centrifugation at 800 g for 30 sec. The nanoparticles were washed twice in double-distilled water (dd H<sub>2</sub>O) by centrifugation at 1750 g for 10 min. Afterwards the nanoparticles were resuspended in 50 µl of dd H<sub>2</sub>O. The entire resuspended pellet was allowed to air dry on carbon-coated, 400-mesh TEM grids.

**DLS.** At three different time points (12, 24, 48 hours), a 1-mL sample of culture solution was removed and prepared for evaluation of hydrodynamic diameter and zeta potential as described above. Non-incubated samples of supplemented culture medium without GNPs were also included in our analysis as negative controls.

#### **Use of the *In-vitro* Sedimentation, Diffusion, and Dosimetry Model to Estimate Target-Tissue Dose.**

A computer simulation was conducted for GNPs at a concentration of  $1.43 \times 10^9$  particles/mL using the following values that were specific to our *ex-vivo* system: 4.0 mm (medium height), 1.0 g/mL (medium density), 0.00074 Ns/m<sup>2</sup> (medium viscosity), 19.3 g/mL (particle density), 37 °C (temperature), 48 hours (maximal simulation time) and 10 nm (primary particle diameter). The computer simulation was conducted in the presence or absence of gravity (9.81 m/s<sup>2</sup>) to evaluate the extent of gravitational influence on the transport of GNPs in our culture model due to the fact that each intact rat ovary was cultured on a nylon mesh oriented *above* either the negative control or the GNP-supplemented culture medium. This evaluation was absolutely critical for diffusion simulations such as ISDD because of the significant influence of

gravity on particle diffusion; results indicated, however, no significant effect of gravity on particle diffusion in our model. The estimated percentage of ovarian surface area relative to the surface area of the culture well had to be determined and factored into our ISDD results because the model solely predicts the dose of particles delivered to a monolayer of cells that is dispersed uniformly over the entire bottom of a culture well. Upon factoring in relative ovarian surface area (approximately 25% of the total well-surface area), results were divided by 1000 or 1 000 000 to determine the estimated target-tissue dose delivered to rat ovary as a function of time upon exposure to  $1.43 \times 10^6$  or  $1.43 \times 10^3$  particles/mL GNPs *ex vivo*, respectively.

**Radioimmunoassay.** Concentrations of immunoreactive (ir)-inhibin in culture medium samples were measured as previously performed in the laboratory of Dr. Gen Watanabe in Tokyo, Japan (Hamada et al. 1989)—using antisera against bovine inhibin (TNDH-1) and bovine 32-kDa inhibin for both iodination and standard, respectively. Assays for all target hormones were validated for rat by demonstrating parallelism between rat serum samples in serial dilution versus authentic standards.

**Multiple-Reference Gene-Quantitative Real-Time RT-PCR (MRG-qPCR).** RNA was precipitated by adding 1/10 volume (10  $\mu$ l) of 2 M NaCl in DEPC-treated water and four sample volumes (400  $\mu$ l) of 100% ethanol, followed by incubation at  $-20^\circ\text{C}$  overnight. Samples were centrifuged and the supernatant decanted. RNA pellets were rinsed twice with 1 mL of 75% ethanol and blotted on a Kim-Wipe®. The samples were then centrifuged to collect extra fluid. Excess ethanol was removed via a 2.0- $\mu$ l micropipette and the RNA pellet was allowed to air-dry for 10-15 minutes. Upon drying, the pellet was resuspended in 40  $\mu$ l RNase-free water. cDNA synthesis was conducted using the AffinityScript® Multiple Temperature cDNA Synthesis Kit per manufacturer's protocol. MRG-qPCR was performed using a StepOne Plus real-time qPCR instrument (Life Technologies Corp., Carlsbad, CA, USA;  $95^\circ\text{C}$  [9 minutes];  $95^\circ\text{C}$  [15 seconds],  $51^\circ\text{C}$  [30 seconds],  $72^\circ\text{C}$  [45 seconds] for 40 cycles;  $95^\circ\text{C}$  [30 seconds],  $55^\circ\text{C}$  [30 seconds],  $95^\circ\text{C}$  [30 seconds]), Power SYBR® Green PCR Master Mix, and gene-specific primers (designed using Primer3 software) to quantify selected transcripts important to ovarian steroidogenesis and oxidative stress (**Table**

**S1).** The PCR efficiency for all selected primer pairs was assumed to be 100%. All qPCR reactions (10  $\mu$ l) were carried out in triplicate. Gel electrophoresis and melting-curve analysis were employed to ensure that the specific gene products of expected size were amplified.

JUST ACCEPTED

**Table S1.** Summary of validated reference and target genes selected for multiple reference gene-qPCR experiment.

| Gene Symbol            | Gene Product                                                                 | Sense Primer              | Antisense Primer          | NCBI Accession Number |
|------------------------|------------------------------------------------------------------------------|---------------------------|---------------------------|-----------------------|
| <b>Reference Genes</b> |                                                                              |                           |                           |                       |
| <i>Zc3h15</i>          | zinc finger CCCH-type containing 15 glyceraldehyde-3-phosphate dehydrogenase | AGGAAGTGTAACCGC<br>TTTTCC | TGCTCACTTTTCAGG<br>TCGTC  | NM_001010963.1        |
| <i>Gapdh</i>           | glyceraldehyde-3-phosphate dehydrogenase                                     | CTGAGGACCAGGTTG<br>TCTCC  | AGGGCCTCTCTCTTG<br>CTCTC  | NM_017008.3           |
| <i>Actb</i>            | $\beta$ -actin                                                               | CAGTGCTGTCTGGTG<br>GCA    | CGCAGCTCAGTAACA<br>GTCCG  | NM_031144.2           |
| <b>Target Genes</b>    |                                                                              |                           |                           |                       |
| <i>Cyp11a1</i>         | side-chain cleavage enzyme steroidogenic acute regulatory protein            | CTGGTCAAAAGTCGC<br>CAAC   | ATTCTGTGTGTGCCG<br>TTCTC  | NM_017286.2           |
| <i>Star</i>            | steroidogenic acute regulatory protein                                       | TGAGGCCCAAGTGTA<br>AGGAC  | GCCTCAGTTCGTGTTT<br>CCTG  | NM_031558.2           |
| <i>Hsd3b1</i>          | $3\beta$ -hydroxysteroid dehydrogenase                                       | ATGTGGTTCTGGGTG<br>TTACC  | TGTCATTGCTGAAGC<br>CTTTG  | NM_001007719.3        |
| <i>Cyp17a1</i>         | $17\alpha$ -hydroxylase/17, 20 lyase                                         | GGAGGGTGATCCCAA<br>GGTAG  | AGGAGGAAGGAGGA<br>CCGTAG  | NM_012753.1           |
| <i>Cyp19a1</i>         | aromatase                                                                    | CTGCTTTGCGTCCTA<br>ACATC  | CACTGACAGHGCACA<br>GTTTCC | NM_017085.2           |
| <i>Hmox1</i>           | heme oxygenase (decycling) 1                                                 | CAAAGACCAGAGTCC<br>CTCAC  | GGCAAGATTCTCCCC<br>TGC    | NM_012580.2           |
| <i>Sod2</i>            | superoxide dismutase 2, mitochondrial                                        | GATTGCCGCCTGCTC<br>TAA    | CTACAAAACACCCAC<br>CACGG  | NM_017051.2           |

**Table S2.** Summary of DLS analyses of GNPs under both stock and culture conditions.

| Dispersant             | Concentration (GNPs/mL) | Zeta Potential (mv)                         | Z-Average Diameter (nm)                     | PdI          | pH  |
|------------------------|-------------------------|---------------------------------------------|---------------------------------------------|--------------|-----|
| Double-distilled water | $5.70 \times 10^{12}$   | -24.4 (2.16)<br>( <i>N</i> =2, <i>n</i> =6) | 243.7 (122.8)                               | 0.62 (0.14)  | 7.0 |
| Culture Solution       | 0                       | -9.5 (0.99)<br>( <i>N</i> =2, <i>n</i> =6)  | 46.1 (4.78)                                 | 0.73 (0.053) | 7.1 |
|                        | $1.43 \times 10^3$      | -9.0 (0.88)<br>( <i>N</i> =9, <i>n</i> =27) | 37.1 (7.63)                                 | 0.86 (0.18)  | 7.1 |
|                        | $1.43 \times 10^6$      | -8.9 (0.61)<br>( <i>N</i> =8, <i>n</i> =24) | 37.0 (7.63)<br>( <i>N</i> =9, <i>n</i> =26) | 0.84 (0.17)  | 7.1 |
|                        | $1.43 \times 10^9$      | -9.4 (0.73)<br>( <i>N</i> =9, <i>n</i> =27) | 37.0 (8.56)<br>( <i>N</i> =9, <i>n</i> =26) | 0.85 (0.17)  | 7.1 |

PdI= polydispersity index. The data were pooled for each specified concentration, independent of incubation period. Measurements of each sample were taken in triplicate. Values are presented as *MEAN (SD)*. *N* = number of replicate samples; *n* = number of total measurements acquired from *N* samples.

**Table S3.** Evaluation of the primary diameter of GNPs under experimental conditions using TEM.

| Concentration<br>(particles/mL)   | Time (Hours) |            |            |            |            |
|-----------------------------------|--------------|------------|------------|------------|------------|
|                                   | 0            | 12         | 24         | 48         | Pooled     |
| <b>2.85x10<sup>7</sup></b>        |              |            |            |            |            |
| Mean (nm)                         | 10.6 (7.0)   | 10.0 (5.9) | 9.2 (5.7)  | 9.3 (5.1)  | 9.8 (5.9)  |
| Range (nm)                        | 4.0 - 34.8   | 2.6 - 37.4 | 3.4 - 41.8 | 2.8 - 43.5 | 2.8 - 43.5 |
| n                                 | 100          | 130        | 130        | 130        | 501        |
| <b>2.85x10<sup>10</sup></b>       |              |            |            |            |            |
| Mean (nm)                         | 7.5 (3.8)    | 9.4 (4.8)  | 10.3 (5.0) | 11.0 (6.6) | 9.3 (5.1)  |
| Range (nm)                        | 2.7 - 31.6   | 4.2 - 27.2 | 3.8 - 30.5 | 3.3 - 32.1 | 2.7 - 32.1 |
| n                                 | 122          | 59         | 120        | 59         | 360        |
| <b>Pooled<sup>(Overall)</sup></b> |              |            |            |            |            |
| Mean (nm)                         |              |            |            |            | 9.6 (5.5)  |
| Range (nm)                        |              |            |            |            | 2.7 - 43.5 |
| n                                 |              |            |            |            | 861        |

Values are presented as *MEAN (SD)*. Data were pooled for each particle concentration, independent of incubation period (*Pooled, right*); and data were pooled independent of particle concentration and incubation period (*Pooled [Overall], bottom left*). n = number of particles measured.



**Table S4.** Summary of the elemental composition of the stock GNP surface as detected by XPS.

| Type          | Transition | Atomic Percent (%) |
|---------------|------------|--------------------|
| Oxygen (O)    | 1s         | 45.9               |
| Carbon (C)    | 1s         | 27.9               |
| Sodium (Na)   | 1s         | 17.7               |
| Chloride (Cl) | 2p         | 3.5                |
| Silicon (Si)  | 2p         | 3.3                |
| Potassium (K) | 2p         | 1.7                |

**Table S5.** Summary of endotoxin contamination as a function of gold concentration in samples of supplemented culture medium.

| Mixture                     | Mean Concentration of Endotoxin (ng/mL) |
|-----------------------------|-----------------------------------------|
| Culture Solution            | 1.55                                    |
| 1.43x10 <sup>3</sup>        | 0.53                                    |
| 1.43x10 <sup>6</sup>        | 0.72                                    |
| 1.43x10 <sup>9</sup>        | 1.43                                    |
| Pooled <sub>(GNPs)</sub>    | 0.89 (0.61)                             |
| range                       | 0.476-2.11                              |
| n                           | 6 samples                               |
| Pooled <sub>(Overall)</sub> | 1.06 (0.70)                             |
| range                       | 0.476-2.24                              |
| n                           | 8 samples                               |

The mean value determined from duplicate samples is presented unless otherwise indicated. 0.01 ng/mL = 1.0 EU/mL endotoxin. Pooled<sub>(GNPs)</sub> = data were pooled for samples containing GNPs independent of concentration. Pooled<sub>(Overall)</sub> = all data were pooled regardless if GNPs were absent or present. Pooled data are presented as *MEAN (SD)*.

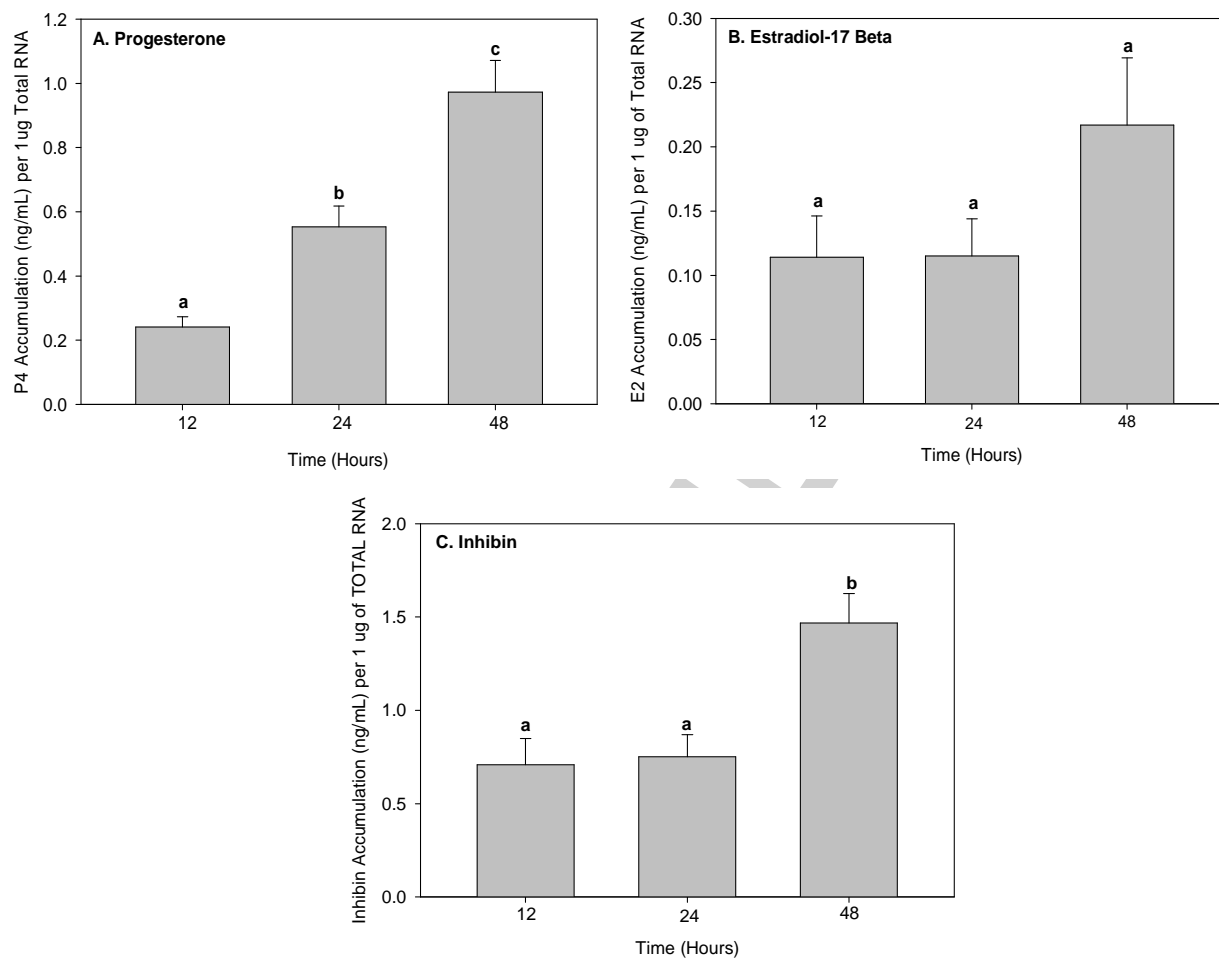

**Figure S1.** Analysis of (A) progesterone (P4), (B) estradiol-17 $\beta$  (E2), and (C) inhibin accumulation secreted from control rat ovaries as a function of time. (A) One-way ANOVA and Tukey's multiple-comparison test revealed a statistically significant time-dependent increase in P4 accumulation *ex vivo* (df= 83 rats,  $p < 0.001$ ). (B) One-way ANOVA showed no significant difference in E2 accumulation as a function of incubation period (df= 68 rats,  $p = 0.159$ ). (C) One-way ANOVA and Tukey's multiple-comparison test revealed a statistically significant increase in inhibin accumulation after 48 hours of incubation compared to that of 12 and 24

hours (df= 78 rats,  $p < 0.001$ ). <sup>a, b, c</sup> Differing subscripts represent statistically significant differences among groups.

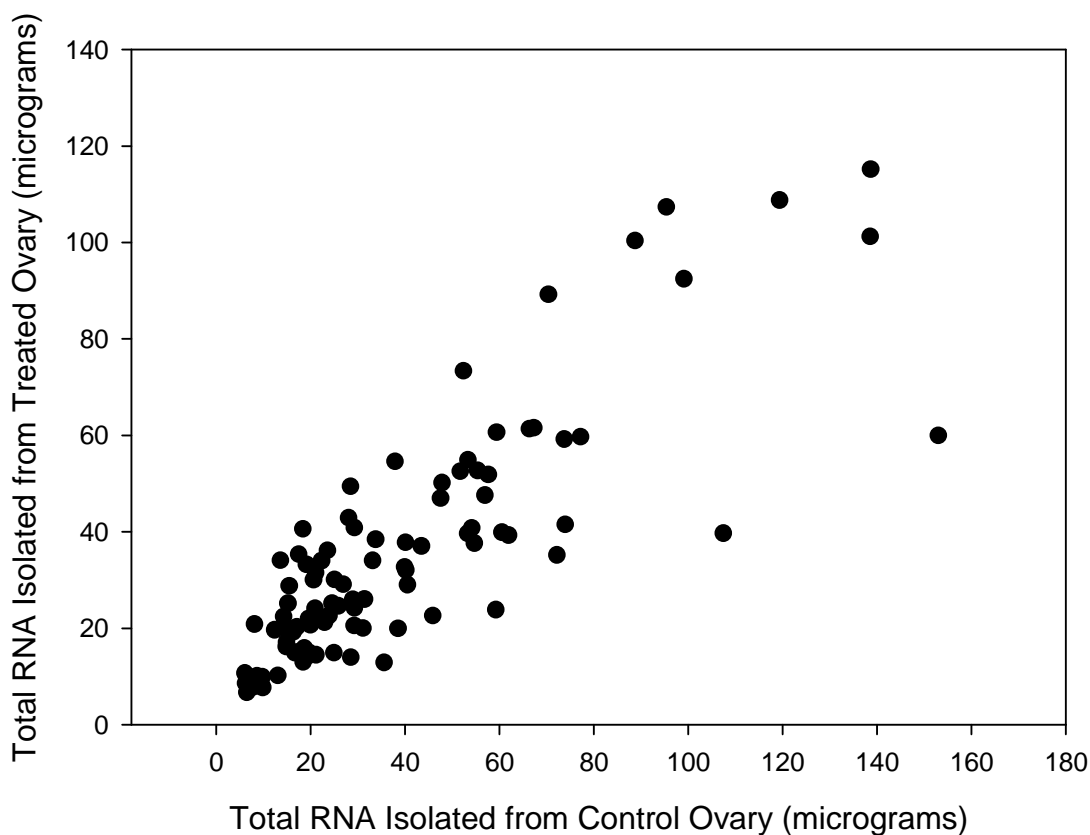

**Figure S2.** Analysis of the relationship between the total RNA isolated from control ovary and the total RNA isolated from the GNP-treated ovary of each respective ovary pair independent of incubation time and particle concentration. Pearson correlation showed a significant positive correlation between these two variables ( $r = 0.836$ ,  $p = 2.94 \times 10^{-26}$ ,  $n = 96$  rats).

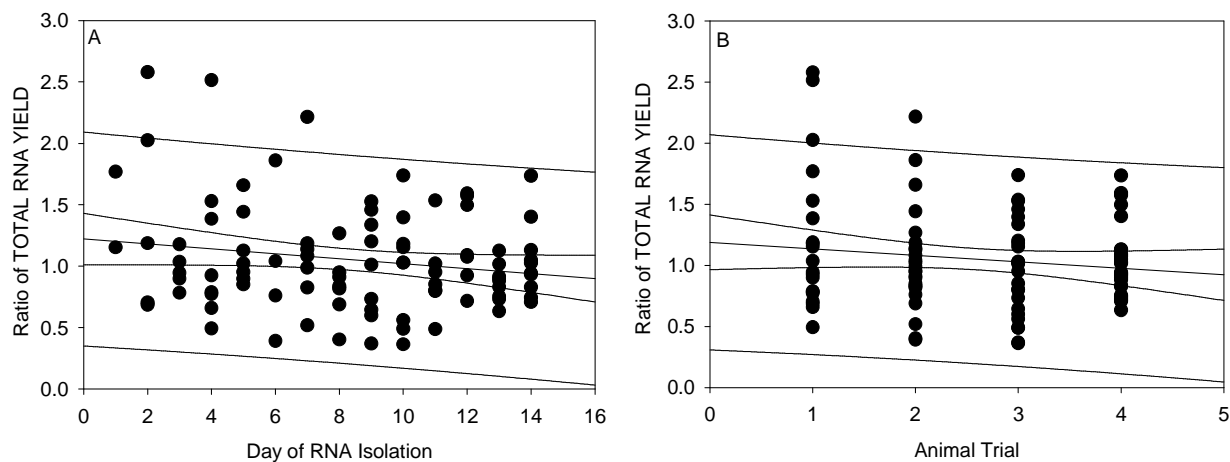

**Figure S3.** Effect of time (A) and animal trial (B) on RNA yield. (A) Simple linear regression showed no significant effect of time on total RNA yield ratio (treated ovary/control ovary) from each respective animal (df= 95 rats,  $p>0.05$ ,  $r^2= 0.0323$ , adjusted [adj.]  $r^2= 0.0220$ ; regression equation [reg eq]:  $y= -0.0201x + 1.221$ ). (B) Simple linear regression also showed no statistically significant relationship between total RNA yield ratios and animal trial (df= 95 rats,  $p>0.05$ ,  $r^2= 0.0185$ , adj.  $r^2= 0.00801$ ; regression equation:  $y= -0.0531x + 1.188$ ).

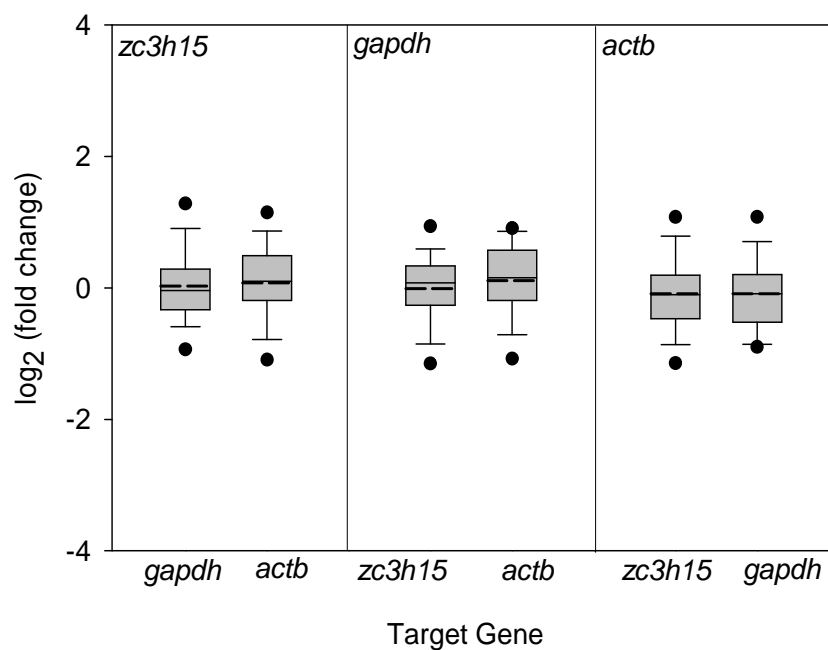

**Figure S4.** Qualitative analysis of the expression stability of our chosen reference genes (*Z3h15*, *Gapdh*, and *Actb*) within our experimental paradigm. The boxplot represents the expression of each reference gene relative to one another, and permits the qualitative evaluation of the relative expression variability of the reference genes upon incubation of rat ovary with GNPs (n=96 rats). Variability in reference gene expression was observed across all experimental groups. The *solid line* represents the median and the *dashed line* represents the mean of each respective data set. Each *box* represents the 50<sup>th</sup> (25<sup>th</sup>/75<sup>th</sup>) percentile and each set of *whiskers* represents the 90<sup>th</sup> (5<sup>th</sup>/95<sup>th</sup>) percentile.

**Table S5.** Summary of simple linear regression analyses of *E2 Accumulation* (y-variable) as a function of each target gene (x-variable).

| <b>X</b>              | <b>b (estimate)</b> | <b>SE</b>    | <b>F</b>     | <b>r<sup>2</sup></b> | <b>adj r<sup>2</sup></b> | <b>p-value</b> |
|-----------------------|---------------------|--------------|--------------|----------------------|--------------------------|----------------|
| <i>Cyp19a1</i>        | 0.0829              | 0.676        | 1.505        | 0.0217               | 0.00727                  | 0.224          |
| <i>Star</i>           | 0.21                | 0.176        | 1.431        | 0.0206               | 0.00621                  | 0.236          |
| <i>Cyp11a1</i>        | 0.104               | 0.119        | 0.766        | 0.0111               | 0.00                     | 0.385          |
| <i>Sod2</i>           | 0.184               | 0.14         | 1.733        | 0.0249               | 0.0105                   | 0.192          |
| <i>Hmox1</i>          | 0.088               | 0.134        | 0.431        | 0.00629              | 0.00                     | 0.514          |
| <b><i>Hsd3b1</i></b>  | <b>0.508</b>        | <b>0.167</b> | <b>9.268</b> | <b>0.12</b>          | <b>0.107</b>             | <b>0.003</b>   |
| <b><i>Cyp17a1</i></b> | <b>0.271</b>        | <b>0.956</b> | <b>8.012</b> | <b>0.105</b>         | <b>0.0922</b>            | <b>0.006</b>   |

Data were pooled for each of these analyses without regard for incubation period or gold nanoparticle concentration. Bold text = statistically significant relationship (p<0.05).

**Table S6.** Summary of simple linear regression analyses of *P4 Accumulation* (y-variable) as a function of each target gene (x-variable).

| <b>X</b>              | <b>b (estimate)</b> | <b>SE</b>    | <b>F</b>     | <b>r<sup>2</sup></b> | <b>adj r<sup>2</sup></b> | <b>p-value</b> |
|-----------------------|---------------------|--------------|--------------|----------------------|--------------------------|----------------|
| <i>Hsd3b1</i>         | 0.500               | 0.273        | 3.341        | 0.039                | 0.0278                   | 0.071          |
| <i>Sod2</i>           | 0.0109              | 0.248        | 0.00193      | 0.0000238            | 0.000                    | 0.965          |
| <i>Hmox1</i>          | 0.028               | 0.228        | 0.015        | 0.000186             | 0.000                    | 0.903          |
| <b><i>Star</i></b>    | <b>0.884</b>        | <b>0.314</b> | <b>7.925</b> | <b>0.0891</b>        | <b>0.0779</b>            | <b>0.006</b>   |
| <b><i>Cyp11a1</i></b> | <b>0.447</b>        | <b>0.205</b> | <b>4.747</b> | <b>0.0554</b>        | <b>0.0437</b>            | <b>0.032</b>   |

Data were pooled for each of the analyses without regard for incubation period or GNP concentration. Bold text = statistically significant relationship (p<0.05).



**Table S7.** Summary of multiple-regression analyses of E2 accumulation (y-variable) as a function of *Cyp19a1*, *Star*, *Cyp11a1*, *Sod2*, and *Hmox1* with concurrent consideration of time and concentration (x-variables).

| X              | b (estimate) | SE      | p-value (variable) | F     | r <sup>2</sup> | adj r <sup>2</sup> | p-value (Model) |
|----------------|--------------|---------|--------------------|-------|----------------|--------------------|-----------------|
| <i>Cyp19a1</i> | 0.0783       | 0.069   | 0.261              | 0.634 | 0.0280         | 0.000              | 0.596           |
| Time           | -0.00095     | 0.00739 | 0.898              |       |                |                    |                 |
| concentration  | -0.0301      | 0.0465  | 0.52               |       |                |                    |                 |
| <i>Star</i>    | 0.201        | 0.182   | 0.273              | 0.613 | 0.0271         | 0.000              | 0.609           |
| time           | -0.00178     | 0.00748 | 0.812              |       |                |                    |                 |
| concentration  | -0.029       | 0.0467  | 0.537              |       |                |                    |                 |
| <i>Cyp11a1</i> | 0.111        | 0.124   | 0.376              | 0.468 | 0.0208         | 0.021              | 0.705           |
| time           | -0.00204     | 0.00762 | 0.79               |       |                |                    |                 |
| concentration  | -0.0353      | 0.0464  | 0.443              |       |                |                    |                 |
| <i>Sod2</i>    | 0.18         | 0.148   | 0.228              | 0.556 | 0.0308         | 0.031              | 0.556           |
| time           | -0.00251     | 0.00756 | 0.741              |       |                |                    |                 |
| concentration  | -0.0252      | 0.047   | 0.594              |       |                |                    |                 |
| <i>Hmox1</i>   | 0.0903       | 0.139   | 0.518              | 0.343 | 0.0154         | 0.015              | 0.794           |
| time           | -0.00148     | 0.00760 | 0.847              |       |                |                    |                 |
| concentration  | -0.0354      | 0.0465  | 0.45               |       |                |                    |                 |

Data were pooled for each of the analyses without regard for incubation period or gold nanoparticle concentration. None of these multiple-regression models showed a statistically significant relationship between E2 accumulation and the independent variables included in these analyses.

**Table S8.** Summary of multiple-regression analyses of E2 accumulation (y-variable) as a function of *Hsd3b1*, *Cyp17a1*, time and concentration (x-variables).

| X                     | b (estimate) | SE      | p-value (variable) | F     | r <sup>2</sup> | adj r <sup>2</sup> | p-value (Model) |
|-----------------------|--------------|---------|--------------------|-------|----------------|--------------------|-----------------|
| <b><i>Hsd3b1</i></b>  | 0.511        | 0.177   | <b>0.005</b>       | 3.011 | 0.12           | 0.080              | 0.036           |
| time                  | -0.00125     | 0.00702 | 0.860              |       |                |                    |                 |
| concentration         | -0.00167     | 0.0459  | 0.971              |       |                |                    |                 |
| <b><i>Cyp17a1</i></b> | 0.307        | 0.099   | <b>0.003</b>       | 3.442 | 0.135          | 0.960              | 0.022           |
| time                  | -0.00503     | 0.00711 | 0.482              |       |                |                    |                 |
| concentration         | -0.0612      | 0.443   | 0.172              |       |                |                    |                 |
| <b><i>Cyp17a1</i></b> | 0.267        | 0.0898  | <b>0.004</b>       | 9.594 | 0.223          | 0.199              | <0.001          |
| <b><i>Hsd3b1</i></b>  | -0.502       | 0.158   | <b>0.002</b>       |       |                |                    |                 |
| <b><i>Hsd3b1</i></b>  | 0.481        | 0.167   | <b>0.005</b>       | 4.955 | 0.187          | 0.002              | 0.002           |
| <b><i>Cy17a1</i></b>  | -0.292       | 0.0941  | <b>0.003</b>       |       |                |                    |                 |
| time                  | -0.00557     | 0.00675 | 0.412              |       |                |                    |                 |
| concentration         | 0.0243       | 0.044   | 0.582              |       |                |                    |                 |

Data were pooled for each of the analyses without regard for incubation period or gold nanoparticle concentration. All multiple-regression models presented here showed statistical significance ( $p < 0.05$ ). Bold text is indicative of the predictor variable(s) derived from each respective regression model.

**Table S9.** Summary of multiple-regression analyses of P4 accumulation (y-variable) as a function of each target gene, time, or concentration (x-variables).

| X                  | b (estimate) | SE           | p-value (variable) | F            | r <sup>2</sup> | adj r <sup>2</sup> | p-value (Model) |
|--------------------|--------------|--------------|--------------------|--------------|----------------|--------------------|-----------------|
| <i>Hsd3b1</i>      | 0.484        | 0.277        | 0.085              | 1.529        | 0.057          | 0.0212             | 0.198           |
| time               | 0.0145       | 0.0127       | 0.257              |              |                |                    |                 |
| concentration      | 0.0365       | 0.0815       | 0.655              |              |                |                    |                 |
| <i>Sod2</i>        | 0.0952       | 0.256        | 0.711              | 0.601        | 0.0223         | 0.000              | 0.616           |
| time               | 0.0154       | 0.0132       | 0.246              |              |                |                    |                 |
| concentration      | 0.0629       | 0.0834       | 0.453              |              |                |                    |                 |
| <i>Hmox1</i>       | 0.0154       | 0.229        | 0.947              | 0.555        | 0.0207         | 0.000              | 0.646           |
| time               | 0.0144       | 0.270        | 0.270              |              |                |                    |                 |
| concentration      | 0.0575       | 0.486        | 0.486              |              |                |                    |                 |
| <i>Cyp11a1</i>     | 0.404        | 0.214        | 0.063              | 1.761        | 0.0627         | 0.0271             | 0.161           |
| time               | 0.008822     | 0.013        | 0.499              |              |                |                    |                 |
| concentration      | 0.0365       | 0.0811       | 0.654              |              |                |                    |                 |
| <b><i>Star</i></b> | <b>0.837</b> | <b>0.321</b> | <b>0.011</b>       | <b>2.868</b> | <b>0.0982</b>  | <b>0.064</b>       | <b>0.042</b>    |
| time               | 0.0095       | 0.0126       | 0.451              |              |                |                    |                 |
| concentration      | 0.0411       | 0.0791       | 0.605              |              |                |                    |                 |
| <b><i>Star</i></b> | <b>0.787</b> | <b>0.315</b> | <b>0.014</b>       | <b>5.651</b> | <b>0.124</b>   | <b>0.102</b>       | <b>0.005</b>    |
| <i>Cyp11a1</i>     | 0.359        | 0.202        | 0.079              |              |                |                    |                 |
| <b><i>Star</i></b> | <b>0.767</b> | <b>0.321</b> | <b>0.019</b>       | <b>2.826</b> | <b>0.127</b>   | <b>0.0818</b>      | <b>0.030</b>    |
| <i>Cyp11a1</i>     | 0.335        | 0.21         | 0.115              |              |                |                    |                 |
| time               | 0.00524      | 0.0054       | 0.681              |              |                |                    |                 |
| concentration      | 0.0251       | 0.0251       | 0.751              |              |                |                    |                 |

Data were pooled for each of the analyses without regard for incubation period or gold nanoparticle concentration. Bold text is indicative of the predictor variable(s) derived from each statistically significant regression model ( $p < 0.05$ ).

**Table S10.** Summary of concentration-specific regression analyses of E2 accumulation (y-variable) as a function of *Cyp17a1*, *Hsd3b1*, or time (x-variables).

| Regression<br>n | Concentration<br>n         | X                                               | b (estimate)                   | SE                                       | p-value<br>(variable)        | F            | r <sup>2</sup>     | adj r <sup>2</sup> | p-value<br>(Model) |
|-----------------|----------------------------|-------------------------------------------------|--------------------------------|------------------------------------------|------------------------------|--------------|--------------------|--------------------|--------------------|
| Simple          | 1.43x10 <sup>3</sup>       | <i>Cyp17a</i> <sub>1</sub>                      | 0.0931                         | 0.163                                    |                              | 0.328        | 0.014 <sub>7</sub> | 0.000              | 0.572              |
| Simple          | 1.43x10 <sup>6</sup>       | <i>Cyp17a</i> <sub>1</sub>                      | 0.365                          | 0.201                                    |                              | 3.293        | 0.136              | 0.0944             | 0.084              |
| <b>Simple</b>   | <b>1.43x10<sup>9</sup></b> | <b><i>Cyp17a</i><sub>1</sub></b>                | <b>0.469</b>                   | <b>0.156</b>                             |                              | <b>9.034</b> | <b>0.301</b>       | <b>0.268</b>       | <b>0.007</b>       |
| <b>Multiple</b> | <b>1.43x10<sup>9</sup></b> | <b><i>Cyp17a</i><sub>1</sub></b><br><b>time</b> | <b>0.526</b><br><b>-0.0094</b> | <b>0.175</b><br><b>0.012<sub>5</sub></b> | <b>0.007</b><br><b>0.462</b> | <b>4.704</b> | <b>0.32</b>        | <b>0.252</b>       | <b>0.021</b>       |
| <b>Simple</b>   | <b>1.43x10<sup>3</sup></b> | <b><i>Hsd3b1</i></b>                            | <b>0.489</b>                   | <b>0.222</b>                             |                              | <b>4.861</b> | <b>0.181</b>       | <b>0.144</b>       | <b>0.038</b>       |
| Simple          | 1.43x10 <sup>6</sup>       | <i>Hsd3b1</i>                                   | 0.54                           | 0.389                                    |                              | 1.932        | 0.084 <sub>3</sub> | 0.0407             | 0.179              |
| Simple          | 1.43x10 <sup>9</sup>       | <i>Hsd3b1</i>                                   | 0.583                          | 0.396                                    |                              | 2.166        | 0.093 <sub>5</sub> | 0.0504             | 0.156              |
| Multiple        | 1.43x10 <sup>3</sup>       | <i>Hsd3b1</i><br>time                           | 0.489<br>-0.00104              | 0.227<br>0.011 <sub>7</sub>              | 0.043<br>0.93                | 2.325        | 0.181              | 0.103              | 0.122              |

Units of concentration = particles/mL. Bold text = statistically significant relationship ( $p < 0.05$ ).

**Table S11.** Summary of concentration-specific regression analyses of P4 accumulation (y-variable) as a function of *Star*, *Cyp11a1*, or time (x-variables).

| Regression      | Concentration              | X                                              | b (estimate)                       | SE                                 | p-value (variable)               | F             | r <sup>2</sup> | adj r <sup>2</sup> | p-value (Model)  |
|-----------------|----------------------------|------------------------------------------------|------------------------------------|------------------------------------|----------------------------------|---------------|----------------|--------------------|------------------|
| Simple          | 1.43x10 <sup>3</sup>       | <i>Star</i>                                    | 0.499                              | 0.348                              |                                  | 2.06          | 0.0893         | 0.0459             | 0.166            |
| <b>Simple</b>   | <b>1.43x10<sup>6</sup></b> | <b><i>Star</i></b>                             | <b>2.229</b>                       | <b>0.679</b>                       |                                  | <b>10.771</b> | <b>0.278</b>   | <b>0.252</b>       | <b>0.003</b>     |
| Simple          | 1.43x10 <sup>9</sup>       | <i>Star</i>                                    | 0.0524                             | 0.370                              |                                  | 0.02          | 0.000715       | 0.000              | 0.888            |
| <b>Multiple</b> | <b>1.43x10<sup>6</sup></b> | <b><i>Star</i><br/>time</b>                    | <b>2.253<br/>0.00189</b>           | <b>0.793<br/>0.0307</b>            | <b>0.008<br/>0.952</b>           | <b>5.196</b>  | <b>0.278</b>   | <b>0.224</b>       | <b>0.012</b>     |
| Simple          | 1.43x10 <sup>3</sup>       | <i>Cyp11a1</i>                                 | 0.016                              | 0.155                              |                                  | 0.0106        | 0.000505       | 0.000              | 0.919            |
| <b>Simple</b>   | <b>1.43x10<sup>6</sup></b> | <b><i>Cyp11a1</i></b>                          | <b>1.969</b>                       | <b>0.489</b>                       |                                  | <b>16.189</b> | <b>0.366</b>   | <b>0.344</b>       | <b>&lt;0.001</b> |
| Simple          | 1.43x10 <sup>9</sup>       | <i>Cyp11a1</i>                                 | 0.0556                             | 0.287                              |                                  | 0.376         | 0.00134        | 0.000              | 0.848            |
| <b>Multiple</b> | <b>1.43x10<sup>6</sup></b> | <b><i>Cyp11a1</i><br/>time</b>                 | <b>1.889<br/>0.0264</b>            | <b>0.494<br/>0.0249</b>            | <b>&lt;0.001<br/>0.299</b>       |               | <b>0.392</b>   | <b>0.347</b>       | <b>0.001</b>     |
| <b>Multiple</b> | <b>1.43x10<sup>6</sup></b> | <b><i>Star</i><br/><i>Cyp11a1</i><br/>time</b> | <b>1.292<br/>1.511<br/>0.00475</b> | <b>0.783<br/>0.0274<br/>0.0274</b> | <b>0.111<br/>0.009<br/>0.864</b> | <b>7.075</b>  | <b>0.449</b>   | <b>0.386</b>       | <b>0.001</b>     |

Units of concentration = particles/mL. Bold text = statistically significant.
